# Supplementary material
Source: PubMed Central journal article supplement (PMC2885210)
Supplement: supp_M110.130716_jbc.M110.130716-2.pdf [file supp_M110.130716_jbc.M110.130716-2.pdf]

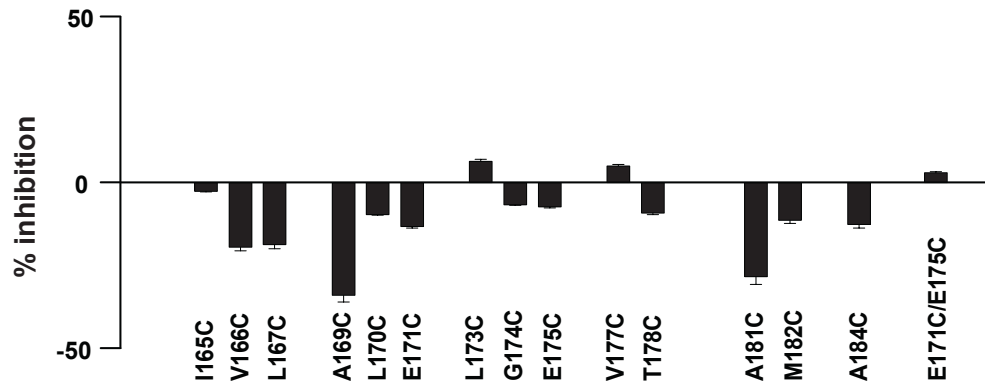

**Supplemental Figure 2. NEM treatment has a limited effect on the transport activity of most TM4 monocysteine mutants.** Inhibition of indicated monocysteine substitution mutants after NEM pretreatment as described in Figure 3B. Transport activity for some mutants was slightly increased after NEM pretreatment resulting in a negative value. Only L164C, F179C, H183C and M185C were inhibited by greater than 50%. The results for these mutants are depicted in Figure 3B.
