# Supplementary material
Source: PubMed Central journal article supplement (PMC2885210)
Supplement: supp_M110.130716_jbc.M110.130716-3.pdf [file supp_M110.130716_jbc.M110.130716-3.pdf]

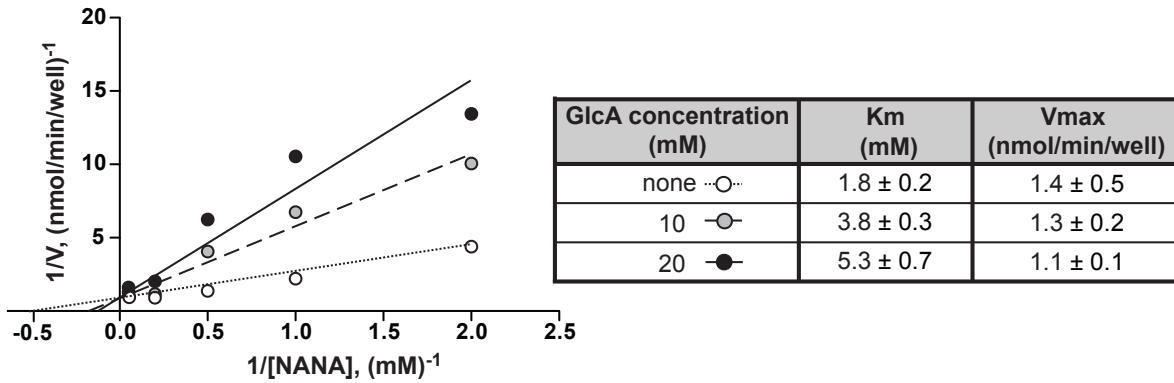

**Supplemental Figure 3. GlcA competitively inhibits F179C mediated NANA transport.**

Lineweaver-Burk plot of F179C mediated NANA transport measured at 2 min in the presence of 20 mM GlcA (solid line, black circles), 10 mM GlcA (dashed line, gray circles), or no GlcA (dotted line, white circles). With increasing GlcA concentrations, the  $V_{max}^{NANA}$  remains relatively constant, while the  $K_m^{NANA}$  increases, consistent with competitive inhibition of NANA transport by GlcA.
