# Supplementary material
Source: PubMed Central journal article supplement (PMC2885210)
Supplement: supp_M110.130716_jbc.M110.130716-4.pdf [file supp_M110.130716_jbc.M110.130716-4.pdf]

| <b>Mutant</b> | <b>Oligonucleotide sequence</b>                                |
|---------------|----------------------------------------------------------------|
| C34S          | 5' GAA GCG GCT CCA GCA T <b>CC</b> TGC TCT GCT CGG TAC AAT     |
| C35S          | 5' GCG GCT CCA GCA T <b>CC</b> G <b>CC</b> TCT GCT CGG TAC AAT |
| C48F          | 5' GCA CTG TTG GCG TTC T <b>TT</b> GGT TTC TTC GTT CTC         |
| C83S          | 5' AGA ACT TCC AAG GAG <b>AGT</b> GCG GAA CAC TCT GCC          |
| C221S         | 5' CTT TCC GGA ATA ATT <b>AGC</b> TAC TAT ATG AAT TGG          |
| C338S         | 5' TTG CCC TAT TTT GGC <b>AGT</b> TGG TTA TGC ATG ATT          |
| C341A         | 5' TTT GGC AGT TGG TTA <b>GGC</b> ATG ATT GTC TGT GGT          |
| C345S         | 5' TTA GGC ATG ATT GTC <b>AGT</b> GGT CAA GCC GCT GAT          |
| C387S         | 5' GCT GGA TTT ATA GGC <b>AGC</b> GAC TAT TCT TTG GCT          |
| C461Y         | 5' TGC CAG ACT CTG TTG T <b>AT</b> ATC GCT GCT GCT ATT A       |

**Supplemental table 1. Sequence of sense primers used to generate the cystless sialin.**

Oligonucleotides used to generate the indicated cysteine substitutions with site-directed mutagenesis. Four of the mutated cysteines are predicted to lie within TMDs Cys-83 (TMD1), and Cys-338, Cys-341, and Cys-345 (TMD8). Cys-48 and Cys-461 were mutated to phenylalanine and tyrosine respectively. These amino acids were chosen because they are present at these positions in human sialin. The bold italic font indicates the mutated nucleotides.
