# Supplementary material
Source: PubMed Central journal article supplement (PMC2885210)
Supplement: supp_M110.130716_jbc.M110.130716-5.pdf [file supp_M110.130716_jbc.M110.130716-5.pdf]

| <b>Mutant</b> | <b>Oligonucleotide sequence</b>                              |
|---------------|--------------------------------------------------------------|
| L164C         | 5' CTG GGA GTG GTG GCG <b>TGT</b> ATC GTG CTG AGA            |
| I165C         | 5' GA GTG GTG GCG CTT <b>TGC</b> GTG CTG AGA GGA CTG         |
| V166C         | 5' GA GTG GTG GCG CTT ATC <b>TGC</b> CTG AGA GCA CTG GAA GG  |
| L167C         | 5' TG GTG GCG CTT ATC GTG <b>TGC</b> AGA GGA CTG GAA GGA CTC |
| R168C         | 5' G GCG CTT ATC GTG CTG <b>TGC</b> GGA CTG GAA GGA CTC G    |
| A169C         | 5' CG CTT ATC GTG CTG AGA <b>TGC</b> CTG GAA GGA CTC GGG GA  |
| L170C         | 5' T ATC GTG CTG AGA GCA <b>TGC</b> GAA GGA CTC GGG GAG G    |
| E171C         | 5' GTG CTG AGA GCA CTG <b>TGC</b> GGA CTC GGG GAG GGT        |
| G172C         | 5' TG AGA GCA CTG GAA <b>TGC</b> CTC GGG GAG GGT GTC         |
| L173C         | 5' GA GCA CTG GAA GGA <b>TGC</b> GGG GAG GGT GTC AC          |
| G174C         | 5' GCA CTG GAA GGA CTC <b>TGC</b> GAG GGT GTC ACG TTT C      |
| E175C         | 5' CTG GAA GGA CTC GGG <b>TGC</b> GGT GTC ACG TTT CCG G      |
| G176C         | 5' AA GGA CTC GGG GAG <b>TGT</b> GTC ACG TTT CCG GC          |
| V177C         | 5' GA CTC GGG GAG GGT <b>TGC</b> ACG TTT CCG GCT ATG         |
| T178C         | 5' GA CTC GGG GAG GGT GTC <b>TGC</b> TTT CCG GCT ATG CAT G   |
| F179C         | 5' GAG GGT GTC ACG <b>TGT</b> CCG GCT ATG CAT G              |
| P180C         | 5' GGG GAG GGT GTC ACG TTT <b>TGC</b> GCT ATG CAT GCC ATG TG |
| A181C         | 5' G GGT GTC ACG TTT CCG <b>TGT</b> ATG CAT GCC ATG TGG      |
| M182C         | 5' GT GTC ACG TTT CCG GCT <b>TGC</b> CAT GCC ATG TGG TCC TC  |
| H183C         | 5' ACG TTT CCG GCT ATG <b>TGT</b> GCC ATG TGG TCC TCC        |
| A184C         | 5' G TTT CCG GCT ATG CAT <b>TGC</b> ATG TGG TCC TCC TGG      |
| M185C         | 5' CCG GCT ATG CAT GCC <b>TGC</b> TGG TCC TCC TGG GC         |
| W186C         | 5' CT ATG CAT GCC ATG <b>TGC</b> TCC TCC TGG GCT             |
| E171C/E175C   | 5' GCA CTG TGC GGA CTC GGG <b>TGC</b> GGT GTC ACG TTT CCG    |

**Supplemental table 2. Sequence of sense primers used to generate the monocysteine substituted sialin.** Oligonucleotides used to generate the indicated substitutions with site-directed mutagenesis. The bold italic font indicates the mutated nucleotides. E171C was used as the template for the mutagenesis reaction to create E171C/E175C.
